# Supplementary material
Source: PubMed Central journal article supplement (PMC3525093)
Supplement: NIHMS424521-supplement-Supporting_Information.pdf [file NIHMS424521-supplement-Supporting_Information.pdf]

## Supporting Information

### Aqueous-Based Initiator Attachment and ATRP Grafting of Polymer Brushes from Poly(methylmethacrylate) Substrates

Sreelatha S. Balamurugan, Balamurugan Subramanian, Jowell G. Bolivar, and Robin L. McCarley\*

*Department of Chemistry, Louisiana State University*

*Baton Rouge, Louisiana 70803-1804*

\*tunnel@LSU.edu

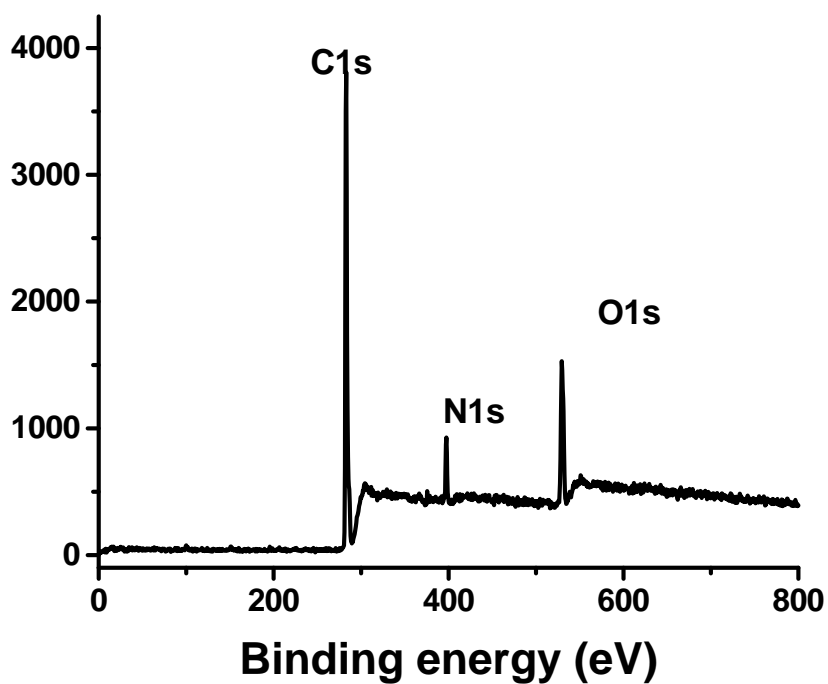

**Figure S1.** X-ray photoelectron survey spectrum of solid PNIPAAm polymer (Aldrich).

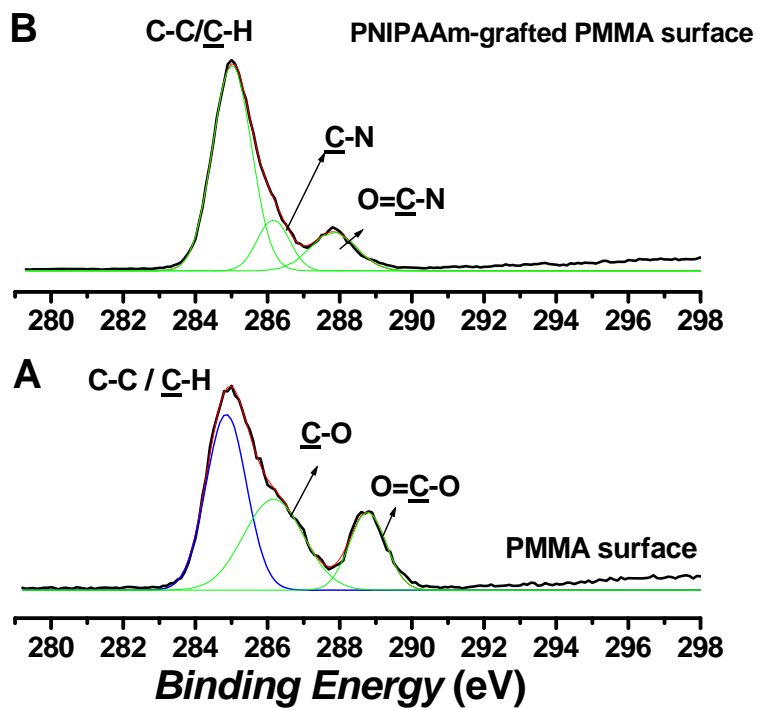

**Figure S2.** High-resolution C 1s X-ray photoelectron spectra of A. PMMA and B. PMMA-PNIPAAm surfaces.

|                                                         |          |
|---------------------------------------------------------|----------|
| <b>Pristine PMMA</b>                                    | <b>1</b> |
| <b>UV-modified PMMA</b>                                 | <b>2</b> |
| <b>NH<sub>2</sub>-PMMA</b>                              | <b>3</b> |
| <b>Initiator-PMMA</b>                                   | <b>4</b> |
| <b>PNIPAAm- PMMA</b>                                    | <b>5</b> |
| <b>NH<sub>2</sub>-PMMA-<br/>used for polymerization</b> | <b>6</b> |

**Figure S3.** Transparent nature of functionalized PMMA and PNIPAAm-grafted PMMA surfaces.
